# Supplementary material
Source: publisher figshare collection journal article supplement (https://future-science-group.figshare.com/ndownloader/files/31362658)
Supplement: Supplementary file 1 [file 31362658]

**Supplemental information 1**

Mass spectrometric conditions of duloxetine, 4HDG and fluoxetine

| Analyte | Precursor ion | Type of ion transition | MRM transition  (product ion) | Dwell time (ms) | Q1  pre-bias  (V) | Collison energy (V) | Q3  pre-bias  (V) |
| --- | --- | --- | --- | --- | --- | --- | --- |
| Duloxetine | 298.25 | Quantifier | m/z 44.15 | 100 | -14 | -11 | -18 |
| Qualifier | m/z 154.10 | 100 | -13 | -10 | -17 |
| 4HDG | 490.25 | Quantifier | m/z 44.20 | 100 | -13 | -21 | -17 |
| Qualifier | m/z 154.15 | 100 | -13 | -10 | -17 |
| Fluoxetine (IS) | 310.15 | Quantifier | m/z 44.20 | 100 | -16 | -13 | -18 |
| Qualifier | m/z 148.15 | 100 | -18 | -7 | -29 |

4HDG: 4-hydroxy duloxetine glucuronide; IS: Internal standard
